# Supplementary material
Source: PubMed Central journal article supplement (PMC4787691)
Supplement: braf738880.w1_default.pdf [file braf738880.w1_default.pdf]

**Indications and clinical conditions associated with an increased risk of caesarean section**

| <b>Indication</b>                              | <b>ICD-10 code and description</b>                                                                                                                                                                                                                                                                                                                                                                  |
|------------------------------------------------|-----------------------------------------------------------------------------------------------------------------------------------------------------------------------------------------------------------------------------------------------------------------------------------------------------------------------------------------------------------------------------------------------------|
| <b>Breech presentation</b>                     | O32.1 Maternal care for breech presentation<br>O32.2 Transverse or oblique lie<br>O64.1 Obstructed labour due to breech presentation                                                                                                                                                                                                                                                                |
| <b>Dystocia</b>                                | O32 Maternal care for malpresentation of fetus (except O32.1, O32.5)<br>O33 Maternal care for known or suspected disproportion<br><br>O61 Failed induction of labour<br>O62 Abnormalities of forces of labour<br>O63 Long labour<br>O64 Obstructed labour due to malpresentation of fetus (except O64.1)<br>O65 Obstructed labour due to maternal pelvic abnormality<br>O66 Other obstructed labour |
| <b>Fetal distress</b>                          | O68 Labour and delivery complicated by fetal stress (distress)<br>O69.0 Labour and delivery complicated by prolapse of cord                                                                                                                                                                                                                                                                         |
| <b>Previous caesarean section<sup>†</sup></b>  | O34.2 Maternal care due to uterine scar from previous surgery                                                                                                                                                                                                                                                                                                                                       |
| <b>Pre-existing diabetes mellitus</b>          | O24.0-.3 Pre-existing diabetes mellitus, unspecified<br>E10 Insulin-dependent diabetes mellitus<br>E11 Non-insulin-dependent diabetes mellitus                                                                                                                                                                                                                                                      |
| <b>Pre-existing hypertension</b>               | O10 Pre-exist hypertension comp preg childbirth and puerperium<br>O11 Pre-exist hypertensive disorder with superimposed proteinuria<br>I10 Essential (primary) hypertension                                                                                                                                                                                                                         |
| <b>Pregnancy related diabetes mellitus</b>     | O24.4, .9 Diabetes mellitus arising in pregnancy                                                                                                                                                                                                                                                                                                                                                    |
| <b>Eclampsia or pre-eclampsia</b>              | O14 Pre-eclampsia<br>O15 Eclampsia                                                                                                                                                                                                                                                                                                                                                                  |
| <b>Placenta praevia or placental abruption</b> | O44 Placenta praevia<br>O45 Premature separation of placenta [abruptio placentae]                                                                                                                                                                                                                                                                                                                   |
| <b>Preterm delivery</b>                        | O60 Preterm delivery                                                                                                                                                                                                                                                                                                                                                                                |

<sup>†</sup>Previous caesarean was also identified from previous birth records (see text).
